# Supplementary material
Source: Springer Nature journal article supplement (https://www.springermedizin.de/resource/supplementary/12933_2005_38_MOESM6_ESM.pdf/9539486)
Supplement: MOESM6 [file 9539486]

# ARTERIAL OSSIFICATION

Modified atherosclerosis in ESRD (highest risk for mortality)  
Calciphylaxis an emerging epidemic? (poor prognosis)  
Abnormal bone mineral metabolism (renal osteodystrophy)

## UREMIA

Elevated Pi, PTH  
II Hyperparathyroidism  
Aging, AGE, and Diabetes  
[ GLUCOSE ] T2DM  
Ox Lipoprotein elevation  
HDL-C low  
•ROS \*  
•Inflammatory Cytokines  
•IL-1, IL-6, TNFalpha  
•Growth Factors: TGF beta  
•Ca<sup>++</sup>, Vitamin D

VSMC (a mesenchymal cell)  
Inflammatory cell  
Pericyte

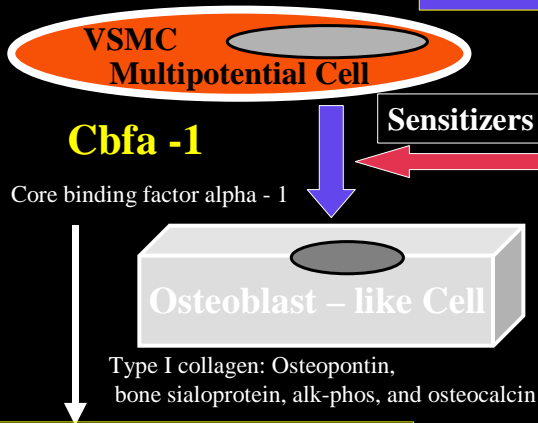

**Cbfa-1 is currently thought to be the “switch” that turns This mesenchymal Cell Into an osteoblast - like Cell**
